# Supplementary material
Source: PubMed Central journal article supplement (PMC6094062)
Supplement: sph004182619st1.pdf [file sph004182619st1.pdf]

## Supplemental Table S1

### Oligonucleotides used in this study.

| Primer       | Sequence              | Use                         |
|--------------|-----------------------|-----------------------------|
| oSA61        | ACTTGCCAAGCGTTTTAGCG  | <i>aacA4</i> qPCR           |
| oSA62        | CTTGGTTCCCAAGCCTTTGC  | <i>aacA4</i> qPCR           |
| oSA69        | TCCCCGATCTCCGCTAAGAA  | <i>aadB</i> qPCR            |
| oSA70        | CAGATGAGCGAAATCTGCCG  | <i>aadB</i> qPCR            |
| oSA77        | GTCATCGTTTCGTTTGAAC   | <i>recA</i> complementation |
| oSA78        | GAATAAAAACGTCGAGTTGTG | <i>recA</i> complementation |
| oSA84        | AGCCACAGTACGTGCCATAG  | <i>ABUW_4052</i> qPCR       |
| oSA85        | GGTGCAGCTTAGCGACAATG  | <i>ABUW_4052</i> qPCR       |
| oSA86        | TAAGCGTCAGGCAGACAAG   | <i>ABUW_RS19335</i> qPCR    |
| oSA87        | TTTTCCACTCTGCTGAAGG   | <i>ABUW_RS19335</i> qPCR    |
| oSA94        | TCGGCAACGATGTGAGAGAG  | <i>strB</i> qPCR            |
| oSA95        | ACTCCTGCAATCGTCAAGGG  | <i>strB</i> qPCR            |
| clpX qRT-For | GCGTTTGAAAGTCGGGCAAT  | <i>clpX</i> qPCR            |
| clpX qRT-Rev | CCATTGCAAACGGCACATCT  | <i>clpX</i> qPCR            |
