# Supplementary material
Source: PubMed Central journal article supplement (PMC6094062)

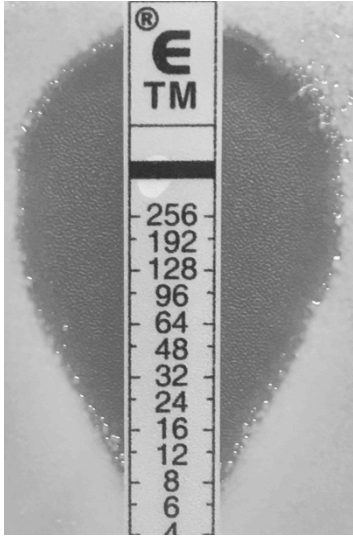

*recA::Tc/vector*

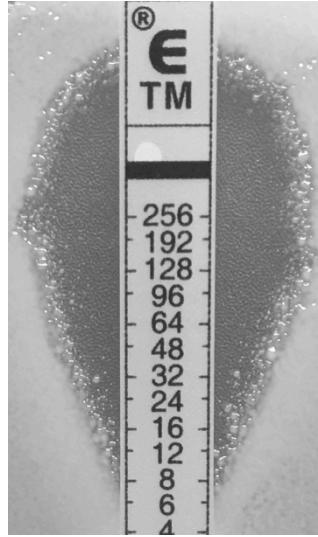

*recA::Tc/precA*

**Supplemental Fig. S1**

Supplement: sph004182619sf1.pdf [file sph004182619sf1.pdf]

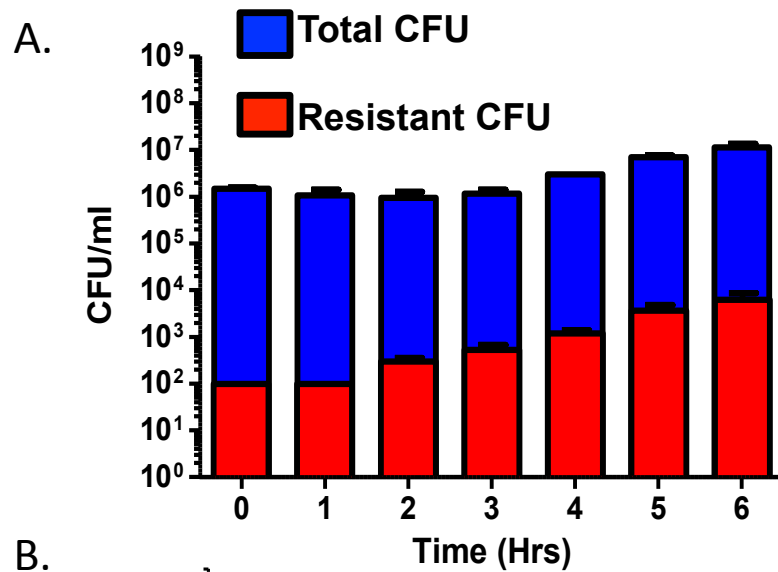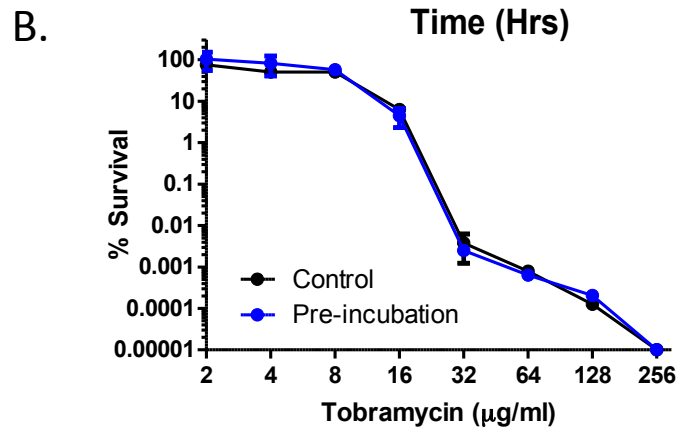

Supplemental Fig. S2

Supplement: sph004182619sf2.pdf [file sph004182619sf2.pdf]
